# Supplementary material
Source: publisher site journal article supplement (https://www.spandidos-publications.com/3283/downloadSupplementary)
Supplement: Supplementary file 1 [file downloadSupplementary]

Data S1. A survey for evaluating the Romanian patient's opinions regarding vaginal delivery after Cesarean section (VBAC) used in the present study: 'VBAC experience in Romania: A retrospective case-series study and online survey'.

1. What is your age?
2. Where do you live? Urban/rural
3. What is your level of education?  
Primary/secondary/high school/post-high school education/university degree/doctoral studies
4. How many times did you give birth vaginally?
5. How many times did you give birth through Cesarean delivery?
6. What was the indication for the first Cesarean delivery?
7. At which gestational age did you give birth vaginally?
8. At which gestational age was conducted the first cesarean delivery?
9. Would you like to try vaginal delivery after Cesarean section (VBAC)? Yes/no
10. The mode of delivery (vaginal/Cesarean section) was established after consulting with you? Yes/no
11. Do you consider that you had enough support from you doctor regarding vaginal delivery?
12. Do you think your doctor will support your VBAC attempt?
13. Have you succeeded VBAC?
14. How many VBACs did you achieve?
15. Did you have at least a vaginal birth in your obstetrical history before VBAC?
16. Have you succeeded with VBAC despite the indication for cesarean delivery?
17. Did you suffer any complications due to VBAC? Yes/no
18. If yes, what complications?
19. Did you suffer for any form of obstetrical violence during your labor or delivery?
20. Where did you deliver naturally? Home/local hospital/university hospital/private hospital/elsewhere
21. Where did you delivered by Cesarean section? Home/local hospital/university hospital/private hospital/elsewhere
22. Where did you succeeded VBAC? Home/local hospital/university hospital/private hospital/elsewhere
23. Did you achieve VBAC with your personal doctor? Yes/no
24. If not, which were the reasons for not being present during your VBAC?
25. Have you ever considered traveling to another city in order to attempt VBAC? Yes/no
26. If yes, where?
27. Do you think that the private health sector from Romania supports VBAC?
28. Would you change your obstetrician if he/she won't support you with the VBAC attempt? Yes/no
29. Do you consider that Romanian obstetricians are open to the VBAC topic? Yes/no
30. During your pregnancy, have you ever felt marginalization from others when you've expressed the desire for VBAC? Yes/no
31. Did you discuss with your obstetrician a birth plan conceived according to your wishes? Yes/no
32. If yes, that birth plan was totally respected?
33. Would you like to experiment other ways of vaginal delivery?
34. If yes, which other options might interest you? Different labor positions/water birth/home birth with midwife
35. Which were the methods/techniques that helped you with relaxation and concentration during labor? Prayer/breathing control/dance/music/essential oils/other
36. Have you been supported through your pregnancy or labor by a doula? Yes/no
37. Did the hospital allow access to your partner, doula or other persons in the labor room? Yes/no
38. How do you appreciate the experience of Cesarean delivery?
39. How do you appreciate the VBAC experience?
40. How do you appreciate the vaginal birth experience?
41. What would you change to the Romanian health system regarding the process of birth?
